# Supplementary material for: β-Catenin disruption decreases macrophage exosomal α-SNAP and impedes Treg differentiation in acute liver injury
Source: JCI journal article supplement (doi:10.1172/jci.insight.182515), 2024-11-19
Supplement: sd1 [file 1]

## Supplementary Materials

### **$\beta$ -catenin disruption decreases macrophage exosomal $\alpha$ -SNAP and impedes Treg differentiation in acute liver injury**

Ruobin Zong<sup>1, #</sup>, Yujie Liu<sup>1, #</sup>, Mengya Zhang<sup>1</sup>, Buwei Liu<sup>1</sup>, Wei Zhang<sup>1</sup>, Hankun Hu<sup>2, 3, 4, \*</sup>,  
Changyong Li<sup>1, 5, \*</sup>

<sup>1</sup> Department of Physiology, Wuhan University TaiKang Medical School (School of Basic Medical Sciences), Wuhan, China.

<sup>2</sup> Department of Pharmacy, Zhongnan Hospital of Wuhan University, Wuhan, Hubei, China.

<sup>3</sup> Hubei Micro-explore Innovative Pharmaceutical Research Co., Ltd, Wuhan, Hubei, China.

<sup>4</sup> Suzhou Organ-on-a-Chip System Science and Technology Co., Ltd, Suzhou, Jiangsu, China.

<sup>5</sup> Xianning Medical College, Hubei University of Science & Technology, Xianning, China.

<sup>#</sup> Ruobin Zong and Yujie Liu have contributed equally to this work.

#### **\*Corresponding authors:**

Changyong Li, MD, PhD.

Department of Physiology, School of Basic Medical Sciences, Wuhan University, 115 Donghu Road, Wuhan 430071, China.

Email: [lichangyong@whu.edu.cn](mailto:lichangyong@whu.edu.cn)

Phone number: +86 13886054335

Hankun Hu, MD, PhD.

Department of Pharmacy, Zhongnan Hospital of Wuhan University, School of Pharmaceutical Sciences, Wuhan University, 169 Donghu Road, Wuhan 430071, China.

Email: [huhankun@whu.edu.cn](mailto:huhankun@whu.edu.cn)

Phone number: +86 13971431601

# Supplementary Figure 1:

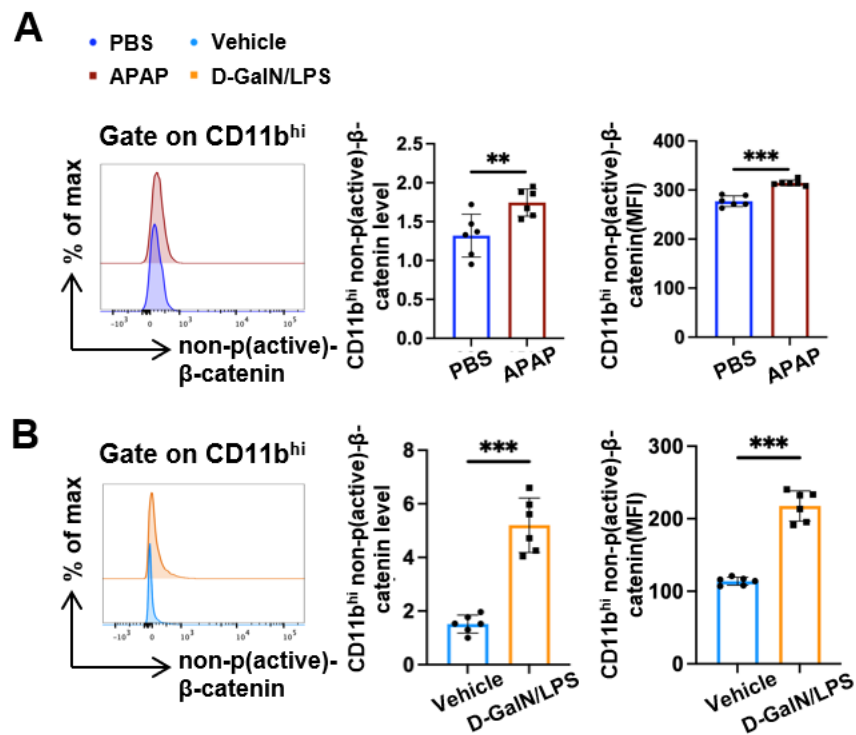

**Supplementary Figure 1. Active  $\beta$ -catenin (non-phospho Ser33/37/Thr41) is upregulated in infiltrating macrophages during acute liver injury.** For APAP overdose-induced acute liver injury, male mice were i.p. injected with APAP (300 mg/kg BW) or same volume of PBS after overnight fasting and the mice were sacrificed 24 h after injection. For D-GalN/LPS-induced acute liver injury, male mice were intraperitoneally (i.p.) injected with 600 mg/kg BW (body weight) of D-GalN and 30  $\mu$ g/kg BW of LPS, or same volume of vehicle, and the mice were sacrificed 5 h after injection. (A) The expression of non-p(active)- $\beta$ -catenin in APAP-induced hepatic macrophages was examined by flow cytometry (n = 6). (B) The expression of non-p(active)- $\beta$ -catenin in D-GalN/LPS induced hepatic macrophages was examined by flow cytometry (n = 6).

## Supplementary Figure 2:

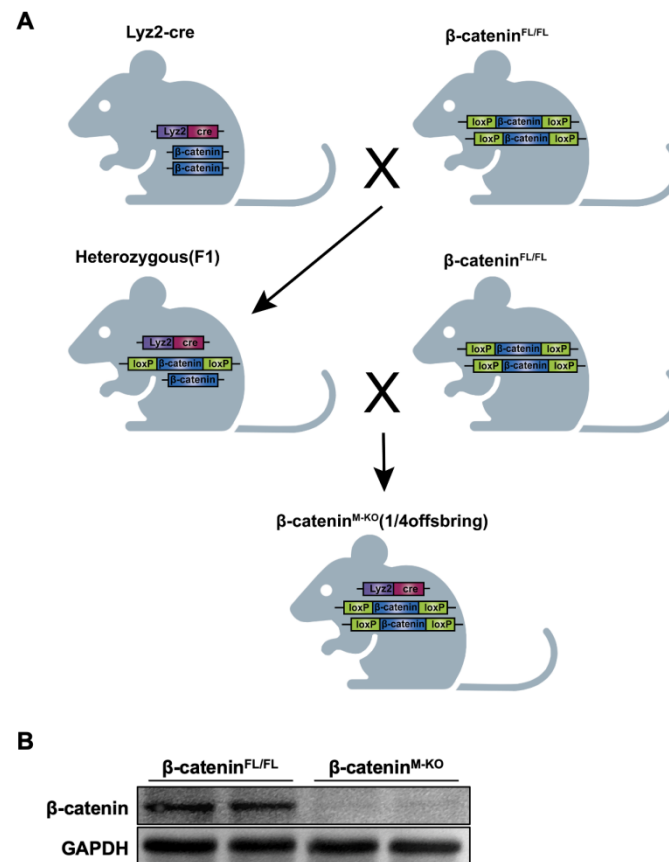

**Supplementary Figure 2. Schematic illustration of generation of myeloid-specific  $\beta$ -catenin knockout mice.** (A) Schematic diagram of  $\beta$ -catenin<sup>M-KO</sup> mouse construction. (B) Western blot analysis of the  $\beta$ -catenin expression in BMDMs.

**Supplementary Figure 3:**

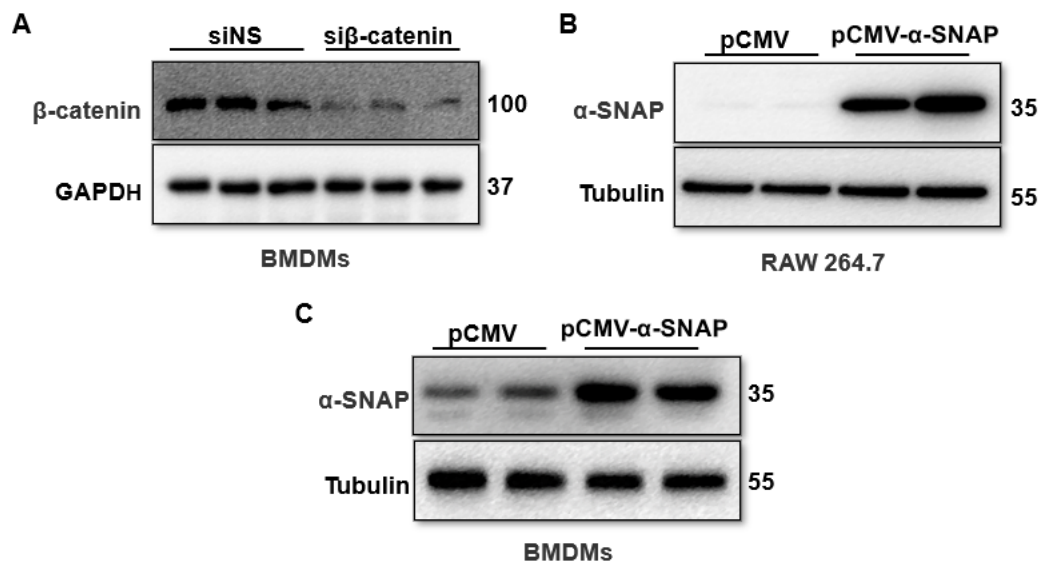

**Supplementary Figure 3. Validation of cell transfection.** BMDMs were transfected with the  $\beta$ -catenin siRNA or pCMV- $\alpha$ -SNAP plasmid. RAW264.7 were transfected with pCMV- $\alpha$ -SNAP plasmid. (A) Western blot analysis of the  $\beta$ -catenin expression in BMDMs. (B) Western blot analysis of the  $\alpha$ -SNAP expression in Raw264.7 cells. (C) Western blot analysis of the  $\alpha$ -SNAP expression in BMDMs.

**Supplementary Figure 4:**

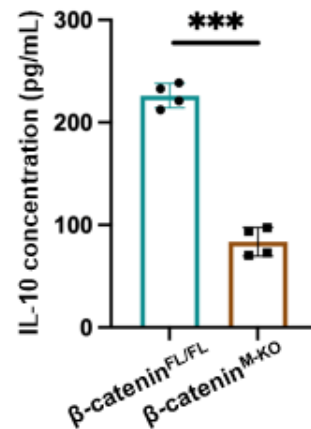

**Supplementary Figure 4. The effect of macrophage  $\beta$ -catenin on the immunosuppressive function of Tregs.** The naïve CD4<sup>+</sup> T cells were co-cultured with BMDMs isolated from  $\beta$ -catenin<sup>FL/FL</sup> and  $\beta$ -catenin<sup>M-KO</sup> mice. The level of IL-10 in Tregs was measured by ELISA (n=4). Values represent means  $\pm$  SD. \*\*\*p < 0.001

### Supplementary Figure 5:

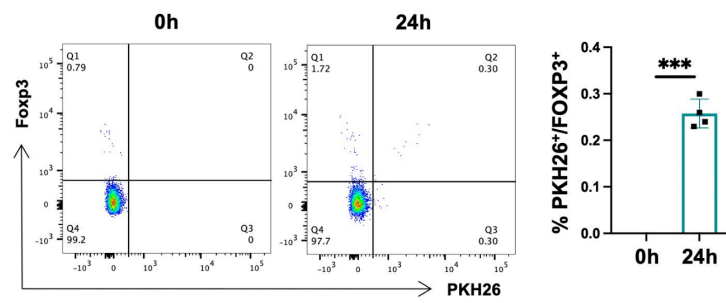

**Supplementary Figure 5. Treg cells take up macrophage exosomes.** BMDM-exosomes were labeled with PKH26 (red) and then co-cultured with naïve CD4<sup>+</sup> T cells for 24h. Then the induction of FcγR3<sup>+</sup> Tregs was detected by flow cytometry (n = 4). Values represent means ± SD. \*\*\*p < 0.001

**Supplementary Table 1. The list of primers used in this study.**

| Gene          | Forward primer (5'-3')  | Reverse primer (5'-3')  |
|---------------|-------------------------|-------------------------|
| <i>Gapdh</i>  | CATCACTGCCACCCAGAAGACTG | ATGCCAGTGAGCTTCCCGTTCAG |
| <i>Ctnnb1</i> | GTTCGCCTTCATTATGGACTGCC | ATAGCACCTGTTCCTCCGCAAAG |
| <i>Napa</i>   | CTGCTTTGTGGACGCTGGCAAT  | AGATGTGGTGCTTGGCTGCGAT  |
